# Supplementary material for: Driving behavior-adaptive particle emissions in plug-in hybrid electric vehicles: cumulative-transient characteristics and clustered patterns for real- world monitoring
Source: Research Square preprint supplement (doi:10.21203/rs.3.rs-7298392/v1), 2025-08-22
Supplement: Supplementary file 1 [file f429b9008ed7311da2cba309.docx]

# Characteristics of PN emission from plug-in hybrid electric vehicle under different driving behaviors

Ruizhi Huang1,2,3, Yuzhuang Pian1,2,3, Li Li1,2,3, Yonghong Liu1,2,3*

1. School of Intelligent Systems Engineering, Shenzhen Campus of Sun Yat-sen University, Shenzhen, 518107, China

2. Guangdong Provincial Key Laboratory of Intelligent Transportation System, Shenzhen, 518107, China

3. Guangdong Provincial Engineering Research Center for Traffic Environmental Monitoring and Control, Shenzhen, 518107, China

* Corresponding author: Yonghong Liu. E-mail: liuyh3@mail.sysu.edu.cn

Appendix A. Supplementary data

Table S1 Vehicle parameters.

| Parameters | Values |
| --- | --- |
| Engine displacement (L) | 1.5 |
| Curb weight (kg) | 1772 |
| Emission standard | China Ⅵ-b |
| Engine power (kW) | 81 |
| Motor power (kW) | 145 |
| Battery capacity (kWh) | 18 |
| Total motor power range (km) | 110 |
| Odometer (km) | 33000 |
| Model year | 2022 |
| Fuel type | Gasoline |
| Fuel grade | 92# |
| Fuel injection | PFI |

Table S2 Fuel-equivalent energy consumption vs. battery energy consumption and its proportion.

| Driving behavior and test set | SOC state at the beginning of test (%) | SOC state at the end of test (%) | Battery energy consumption (kWh) |
| --- | --- | --- | --- |
| Calm test 1 | 48.63 | 49.81 | -0.11 |
| Calm test 2 | 47.85 | 49.81 | -0.18 |
| Normal test 1 | 48.63 | 51.77 | -0.29 |
| Normal test 2 | 45.89 | 33.73 | 1.11 |
| ACC test 1 | 49.81 | 49.81 | 0 |
| ACC test 2 | 50.99 | 50.99 | 0 |
| Aggressive test 1 | 48.63 | 49.81 | -0.11 |
| Aggressive test 2 | 49.81 | 49.81 | 0 |
| Driving behavior and test set | Fuel consumption of test (kg) | Fuel-equivalent energy consumption (kWh) | The battery energy consumption ratio (%) |
| Calm test 1 | 3.97 | 12.51 | 0.87 |
| Calm test 2 | 3.87 | 12.19 | 1.49 |
| Normal test 1 | 4.31 | 13.58 | 2.16 |
| Normal test 2 | 3.73 | 11.75 | 8.65 |
| ACC test 1 | 4.87 | 15.34 | 0 |
| ACC test 2 | 4.30 | 13.55 | 0 |
| Aggressive test 1 | 5.99 | 18.87 | 0.58 |
| Aggressive test 2 | 5.81 | 18.30 | 0 |

Table S3 Cluster centroid features of driving behaviors and HES levels derived from k-means clustering.

| Behavior | HES level | Engine speed (rpm) | Engine load (%) | Acceleration (m/s2) | Vehicle speed  (m/s2) | Cold start proportion  （%） | Restart proportion  （%） |
| --- | --- | --- | --- | --- | --- | --- | --- |
| Normal | HES-20 | 1905 | 68 | 0.7 | 71.6 | 83.3 | 83.3 |
| Aggressive | HES-20 | 2127 | 84 | 0.8 | 70.3 | 28.6 | 14.3 |
| Aggressive | HES-20 | 3384 | 99 | 0.9 | 119.7 | 0 | 9.1 |
| ACC | HES-20 | 1951 | 46 | 0.4 | 76.3 | 0 | 50 |
| ACC | HES-20 | 2875 | 94 | 0.1 | 115.7 | 0 | 66.7 |
| ACC | HES-20 | 2062 | 46 | 0.8 | 77.9 | 0 | 80 |
| ACC | HES-20 | 1960 | 72 | 0.2 | 50.5 | 100 | 50 |
| Normal | HES-50 | 1976 | 43 | 1.5 | 69.2 | 0 | 100 |
| Normal | HES-50 | 2428 | 85 | 0 | 97.9 | 0 | 55.6 |
| Normal | HES-50 | 1978 | 82 | 0.7 | 72.2 | 55.6 | 83.3 |
| Aggressive | HES-50 | 3494 | 99 | 0.5 | 126.5 | 0 | 0 |
| Aggressive | HES-50 | 2415 | 91 | 0.8 | 94.7 | 3.6 | 12.5 |
| Aggressive | HES-50 | 2207 | 82 | 0.7 | 91.6 | 0 | 45 |
| Aggressive | HES-50 | 2115 | 65 | 0.7 | 87.8 | 5.6 | 50 |
| Aggressive | HES-50 | 3574 | 97 | 1.9 | 116.5 | 9.1 | 31.8 |
| ACC | HES-50 | 2028 | 86 | 0.7 | 84.8 | 21.4 | 50 |
| ACC | HES-50 | 2875 | 100 | 0.4 | 116 | 0 | 21.7 |
| ACC | HES-50 | 2100 | 65 | 0.6 | 86.8 | 0 | 78.6 |
| Calm | HES-50 | 2247 | 84 | 0.3 | 90.4 | 0 | 80 |
| Calm | HES-50 | 1892 | 69 | 0.8 | 44.1 | 100 | 100 |
| Calm | HES-50 | 1360 | 34 | -0.1 | 0.0 | 0.0 | 1360 |
| Calm | HES-50 | 1970 | 70 | 0.6 | 79.5 | 16.7 | 83.3 |
| Normal | HES-80 | 2081 | 77 | 1.1 | 79.4 | 10.1 | 84.2 |
| Normal | HES-80 | 2604 | 88 | 0.5 | 105.5 | 1.4 | 28.8 |
| Aggressive | HES-80 | 3099 | 99 | 1.6 | 112.4 | 1.1 | 20.9 |
| Aggressive | HES-80 | 2154 | 74 | 1.5 | 75 | 2.7 | 74.3 |
| ACC | HES-80 | 2898 | 99 | 0.4 | 116.4 | 0 | 13.8 |
| ACC | HES-80 | 2211 | 77 | 0.8 | 85.8 | 0 | 83.8 |
| ACC | HES-80 | 2114 | 88 | 0.5 | 85.7 | 4.1 | 37.4 |
| ACC | HES-80 | 2066 | 73 | 1.3 | 64.2 | 5.6 | 88.9 |
| Calm | HES-80 | 2223 | 87 | 0.4 | 89.3 | 1 | 39.6 |
| Calm | HES-80 | 2086 | 75 | 0.6 | 77.2 | 0 | 98 |
| Calm | HES-80 | 1960 | 69 | 0.9 | 66.7 | 23.1 | 80.8 |

Fig. S1 Determination of HES about PN emission rates in normal test 1, which contains 4106 s after exclusion.

Fig. S2 PN portion of different segments in all tests.

Fig. S3 Instantaneous PN rates and time proportion of HES in all tests. Light blue vertical lines represent HES-20, HES-50, and HES-80 respectively.
